# Supplementary material
Source: PubMed Central journal article supplement (PMC3635241)
Supplement: ismej2012165x2.pdf [file ismej2012165x2.pdf]

**Table S1 *GeXP analysis***

| Function                            | Gene                           | H                 | I                 | N                 | H vs. I      | H vs. N      | I vs. N      |
|-------------------------------------|--------------------------------|-------------------|-------------------|-------------------|--------------|--------------|--------------|
| Cytoskeleton/skeleton rearrangement | $\alpha$ -tubulin              | 0.199 $\pm$ 0.058 | 0.013 $\pm$ 0.008 | 0.012 $\pm$ 0.005 | <b>0.014</b> | <b>0.015</b> | 0.435        |
|                                     | $\beta$ -tubulin               | 0.536 $\pm$ 0.359 | 0.213 $\pm$ 0.015 | 0.177 $\pm$ 0.133 | 0.130        | 0.112        | 0.383        |
|                                     | Actin                          | 3.475 $\pm$ 1.458 | 1.904 $\pm$ 0.053 | 3.502 $\pm$ 2.066 | 0.101        | 0.494        | 0.236        |
|                                     | Actin-related protein 2/3      | 0.968 $\pm$ 0.017 | 0.898 $\pm$ 0.035 | 0.663 $\pm$ 0.166 | 0.088        | 0.116        | 0.142        |
|                                     | Gelsolin                       | 0.950 $\pm$ 0.101 | 0.546 $\pm$ 0.033 | 0.923 $\pm$ 1.021 | <b>0.006</b> | 0.488        | 0.347        |
|                                     | Profilin                       | 0.818 $\pm$ 0.048 | 0.824 $\pm$ 0.067 | 0.907 $\pm$ 0.694 | 0.465        | 0.443        | 0.446        |
|                                     | Prolidase                      | 0.146 $\pm$ 0.150 | 0.013 $\pm$ 0.003 | 0.055 $\pm$ 0.042 | 0.133        | 0.206        | 0.197        |
|                                     | B-thymosin                     | 0.339 $\pm$ 0.019 | 0.175 $\pm$ 0.022 | 0.277 $\pm$ 0.029 | <b>0.006</b> | 0.075        | <b>0.033</b> |
|                                     | Villin                         | 0.540 $\pm$ 0.100 | 0.676 $\pm$ 0.102 | 0.783 $\pm$ 0.562 | 0.133        | 0.325        | 0.416        |
|                                     | Radial Spoke Protein           | 0.864 $\pm$ 0.130 | 0.229 $\pm$ 0.106 | 0.253 $\pm$ 0.111 | <b>0.007</b> | <b>0.008</b> | 0.424        |
| Signal transduction                 | Calmodulin                     | 0.469 $\pm$ 0.065 | 0.126 $\pm$ 0.039 | 0.159 $\pm$ 0.092 | <b>0.003</b> | <b>0.036</b> | 0.353        |
|                                     | YWHAQ                          | 0.989 $\pm$ 0.081 | 0.884 $\pm$ 0.080 | 0.805 $\pm$ 0.473 | 0.137        | 0.339        | 0.426        |
| Chaperone                           | Cyclophilin                    | 2.097 $\pm$ 0.090 | 1.328 $\pm$ 0.004 | 1.645 $\pm$ 0.228 | <b>0.002</b> | 0.096        | 0.150        |
|                                     | Hsp70                          | 0.098 $\pm$ 0.029 | 0.361 $\pm$ 0.077 | 0.588 $\pm$ 0.534 | 0.053        | 0.209        | 0.328        |
|                                     | Hsp90                          | 2.139 $\pm$ 1.038 | 2.135 $\pm$ 0.184 | 2.041 $\pm$ 1.163 | 0.498        | 0.466        | 0.464        |
| Protein synthesis/degradation       | Apoptosis-linked gene 2I       | 0.019 $\pm$ 0.008 | 0.139 $\pm$ 0.025 | 0.140 $\pm$ 0.042 | <b>0.038</b> | 0.074        | 0.496        |
|                                     | Cyclophilin NIMA-interacting 4 | 0.040 $\pm$ 0.005 | 0.020 $\pm$ 0.004 | 0.040 $\pm$ 0.026 | <b>0.008</b> | 0.493        | 0.240        |

|                         |                                     |               |               |               |                   |                   |              |
|-------------------------|-------------------------------------|---------------|---------------|---------------|-------------------|-------------------|--------------|
|                         | <b>Elongation factor - Tu</b>       | 0.249 ± 0.027 | 0.118 ± 0.025 | 0.025 ± 0.013 | <b>0.010</b>      | <b>0.001</b>      | <b>0.037</b> |
|                         | <b>Polyubiquitin</b>                | 0.691 ± 0.071 | 0.547 ± 0.039 | 0.949 ± 0.802 | <b>0.031</b>      | 0.364             | 0.304        |
|                         | <b>Ribosomal Protein S9</b>         | 0.121 ± 0.019 | 0.043 ± 0.002 | 0.060 ± 0.005 | <b>0.009</b>      | <b>0.012</b>      | <b>0.046</b> |
|                         | <b>Ubiquitin Conjugating Enzyme</b> | 0.235 ± 0.042 | 0.086 ± 0.004 | 0.392 ± 0.475 | <b>0.012</b>      | 0.361             | 0.265        |
| <b>Oxidative stress</b> | <b>Ferritin</b>                     | 1.594 ± 0.323 | 1.102 ± 0.009 | 1.065 ± 0.160 | 0.059             | <b>0.048</b>      | 0.398        |
| <b>Detoxification</b>   | <b>Glutathione-S-Transferase</b>    | 0.580 ± 0.022 | 0.041 ± 0.012 | 0.029 ± 0.022 | <b>&lt; 0.001</b> | <b>&lt; 0.001</b> | 0.297        |

\* Average expression with standard deviations are shown. *P*-values show pair-wise *t*-test between the healthy (H), intermediate (I), and necrotic (N) groups.

*P*-values < 0.05 are in bold.
