# Supplementary material
Source: PubMed Central journal article supplement (PMC3635241)
Supplement: ismej2012165x4.pdf [file ismej2012165x4.pdf]

**Table S3 Information for the metagenomic analysis of *R. odorabile* clones**

| Sample                                 | WT-a              | WT-b              | WT-c              | T27-Day4-a        | T27-Day4-b        | T27-Day4-c        | T32-Day3-c       | T32-Day4-a        | T32-Day4-b        | T32-Day4-c       |
|----------------------------------------|-------------------|-------------------|-------------------|-------------------|-------------------|-------------------|------------------|-------------------|-------------------|------------------|
| <b>Trace file</b>                      | BBAY34            | BBAY35            | BBAY36            | BBAY49            | BBAY50            | BBAY51            | BBAY52           | BBAY53            | BBAY54            | BBAY55           |
| <b>Raw read</b>                        | 949133            | 583576            | 519285            | 742998            | 695928            | 627630            | 537954           | 403759            | 660167            | 453805           |
| <b>Average read size (nt)</b>          | 402.0             | 377.3             | 401.6             | 423.4             | 428.2             | 343.5             | 316.1            | 311               | 391               | 368.1            |
| <b>Unique read</b>                     | 904146            | 505357            | 506761            | 716090            | 639263            | 606860            | 507711           | 399034            | 635356            | 388317           |
| <b>16S rRNA gene containing reads</b>  | 298<br>(0.03%)    | 198<br>(0.04%)    | 201<br>(0.04%)    | 315<br>(0.04%)    | 267<br>(0.04%)    | 195<br>(0.03%)    | 496<br>(0.10%)   | 984<br>(0.25%)    | 270<br>(0.04%)    | 171<br>(0.04%)   |
| <b>Constructed 16S Seqs</b>            | 40                | 36                | 34                | 39                | 32                | 31                | 45               | 31                | 41                | 39               |
| <b>Reads in 16S Seqs</b>               | 209               | 149               | 139               | 243               | 210               | 151               | 297              | 776               | 175               | 112              |
| <b>Min length of 16S Seqs (nt)</b>     | 781               | 781               | 781               | 839               | 934               | 839               | 747              | 747               | 839               | 747              |
| <b>Max length of 16S Seqs (nt)</b>     | 1542              | 1542              | 1542              | 1542              | 1542              | 1542              | 1542             | 1542              | 1542              | 1542             |
| <b>Avg length of 16S Seqs (nt)</b>     | 1417              | 1405              | 1406              | 1403              | 1435              | 1418              | 1376             | 1350              | 1397              | 1366             |
| <b>Aligned read</b>                    | 460513<br>(50.9%) | 198840<br>(39.4%) | 180893<br>(35.7%) | 397269<br>(55.5%) | 334502<br>(52.3%) | 270894<br>(44.6%) | 67199<br>(13.2%) | 225756<br>(56.6%) | 235761<br>(37.1%) | 81113<br>(20.9%) |
| <b>Contig &gt; 500 nt</b>              | 44408             | 17286             | 19306             | 35262             | 34102             | 16733             | 6420             | 3796              | 28674             | 10205            |
| <b>Average size of contig &gt; 500</b> | 902               | 900               | 836               | 1002              | 894               | 1092              | 743              | 2441              | 784               | 687              |

|                                       |         |         |         |         |         |         |         |         |         |         |
|---------------------------------------|---------|---------|---------|---------|---------|---------|---------|---------|---------|---------|
| <b>nt (nt)</b>                        |         |         |         |         |         |         |         |         |         |         |
| <b>N50 size of contig &gt; 500 nt</b> | 909     | 909     | 838     | 1018    | 895     | 1178    | 724     | 5055    | 776     | 664     |
| <b>(nt)</b>                           |         |         |         |         |         |         |         |         |         |         |
| <b>Maximum size of contig &gt;</b>    | 52481   | 16414   | 16419   | 52143   | 18553   | 17003   | 6062    | 89781   | 5441    | 3749    |
| <b>500 nt (nt)</b>                    |         |         |         |         |         |         |         |         |         |         |
| <b>Contig &gt; 100 nt</b>             | 71479   | 29504   | 32819   | 54685   | 55119   | 28502   | 11648   | 5262    | 46143   | 18175   |
| <b>Singleton /outlier &gt; 100 nt</b> | 416488  | 284341  | 296611  | 306056  | 291996  | 317341  | 407146  | 153752  | 382667  | 282041  |
| <b>Non-eukaryotic contig and</b>      | 486090  | 310735  | 326136  | 359921  | 346460  | 345197  | 417634  | 158279  | 428032  | 299667  |
| <b>singleton/outlier</b>              | (99.6%) | (99%)   | (99%)   | (99.8%) | (99.8%) | (99.8%) | (99.7%) | (99.5%) | (99.8%) | (99.8%) |
| <b>Unique predicted protein</b>       | 597098  | 367768  | 394503  | 450176  | 433069  | 401283  | 475263  | 186518  | 518234  | 356540  |
| <b>Total protein</b>                  | 828348  | 457510  | 480812  | 645157  | 609660  | 515151  | 505473  | 254007  | 636935  | 396781  |
| <b>Protein annotated by COG</b>       | 230428  | 120728  | 123659  | 204875  | 181301  | 134597  | 104924  | 89516   | 175661  | 100811  |
| <b>(E&lt;10<sup>-10</sup>)</b>        | (27.8%) | (26.4%) | (25.7%) | (31.8%) | (29.7%) | (26.1%) | (20.8%) | (35.2%) | (27.6%) | (25.4%) |
| <b>Protein annotated by Pfam</b>      | 219205  | 115740  | 118378  | 194148  | 173218  | 126218  | 25965   | 85497   | 162726  | 92386   |
| <b>(E&lt;10<sup>-10</sup>)</b>        | (26.5%) | (25.3%) | (24.6%) | (30.1%) | (28.4%) | (24.5%) | (5.1%)  | (33.7%) | (25.5%) | (23.3%) |
| <b>Protein annotated by SEED</b>      | 338201  | 180828  | 187208  | 290960  | 266252  | 199504  | 171954  | 129579  | 255930  | 151296  |
| <b>(E&lt;10<sup>-10</sup>)</b>        | (40.8%) | (39.5%) | (38.9%) | (45.1%) | (43.7%) | (38.7%) | (34%)   | (51%)   | (40.2%) | (38.1%) |

\* WT, wild-type.
