# Supplementary material
Source: PubMed Central journal article supplement (PMC3635241)
Supplement: ismej2012165x5.pdf [file ismej2012165x5.pdf]

**Table S4** *Information for the metaproteomic analysis of R. odorabile clones*

| Sample                                        | T27-Day4-a | T27-Day4-b | T32-Day3-c | T32-Day4-a | T32-Day4-b | T32-Day4-c |
|-----------------------------------------------|------------|------------|------------|------------|------------|------------|
| Unique proteins                               | 462        | 584        | 420        | 301        | 577        | 582        |
| (peptides)                                    | 1 389      | 1 727      | 1 218      | 1 061      | 1 642      | 1 713      |
| Proteins annotated by COG ( $E < 10^{-10}$ )  | 52         | 71         | 57         | 107        | 81         | 81         |
| (peptides)                                    | 331        | 482        | 349        | 720        | 529        | 605        |
| Proteins annotated by Pfam ( $E < 10^{-10}$ ) | 52         | 86         | 80         | 176        | 104        | 102        |
| (peptides)                                    | 427        | 625        | 536        | 1255       | 730        | 788        |
| Proteins annotated by SEED ( $E < 10^{-10}$ ) | 53         | 79         | 74         | 123        | 92         | 96         |
| (peptides)                                    | 433        | 596        | 590        | 1718       | 885        | 956        |
